# Supplementary material for: A confined thermal transformation strategy to synthesize single atom catalysts supported on nitrogen-doped mesoporous carbon nanospheres for selective hydrogenation
Source: Royal Society of Chemistry journal article supplement (doi:10.1039/d1ta08365a), 2021-01-01
Supplement: d1ta08365a1.pdf [file d1ta08365a1.pdf]

## Supplementary Information

### **Confined thermal transformation strategy to synthesize single atom catalysts supported on nitrogen-doped mesoporous carbon nanospheres for selective hydrogenation**

Zhengbin Tian,<sup>a,b</sup> Wenquan Wang,<sup>a,b</sup> Yan Zheng<sup>a</sup> and Guang-Hui Wang<sup>\*a,b</sup>

<sup>a</sup>Qingdao Institute of Bioenergy and Bioprocess Technology, Chinese Academy of Sciences, 266101 Qingdao,  
China.

<sup>b</sup>University of Chinese Academy of Sciences, 100049 Beijing, China

\*E-mail: wanggh@qibebt.ac.cn

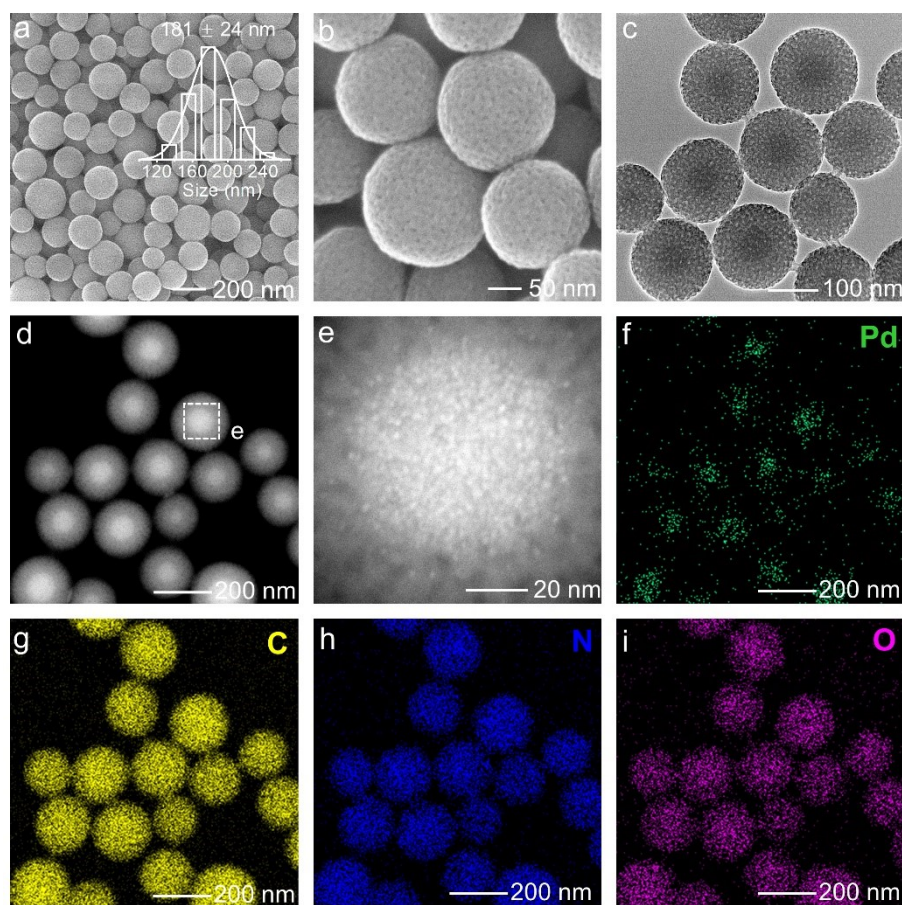

**Fig. S1** (a,b) SEM images, (c) TEM image, (d-i) HAADF-STEM and the corresponding EDS elemental mapping images of Pd-NCs@NMPS-0.

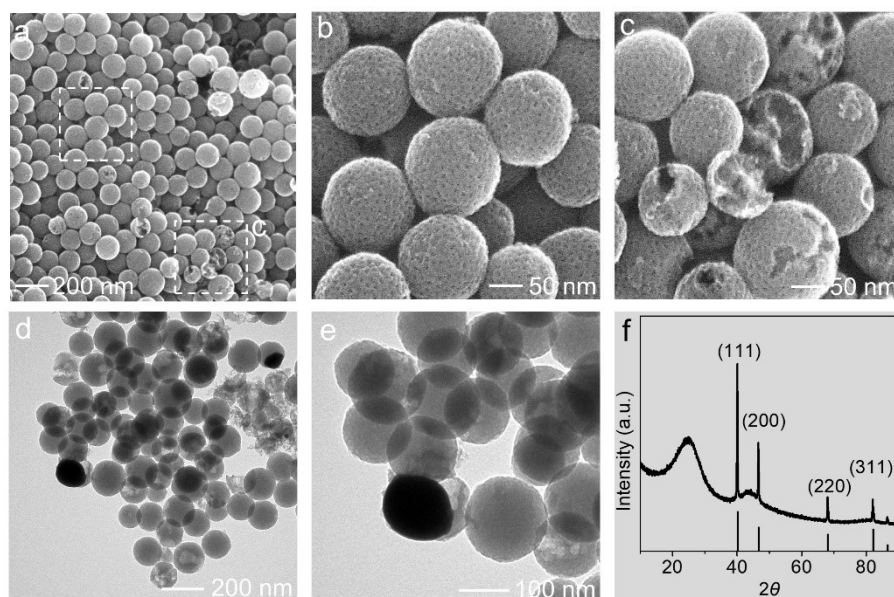

**Fig. S2** (a-c) SEM images, (d,e) TEM images and (f) XRD pattern of Pd-NCs@NMPS-0 after pyrolysis at 800 °C under a  $\text{NH}_3/\text{Ar}$  (5%/95%) flow.

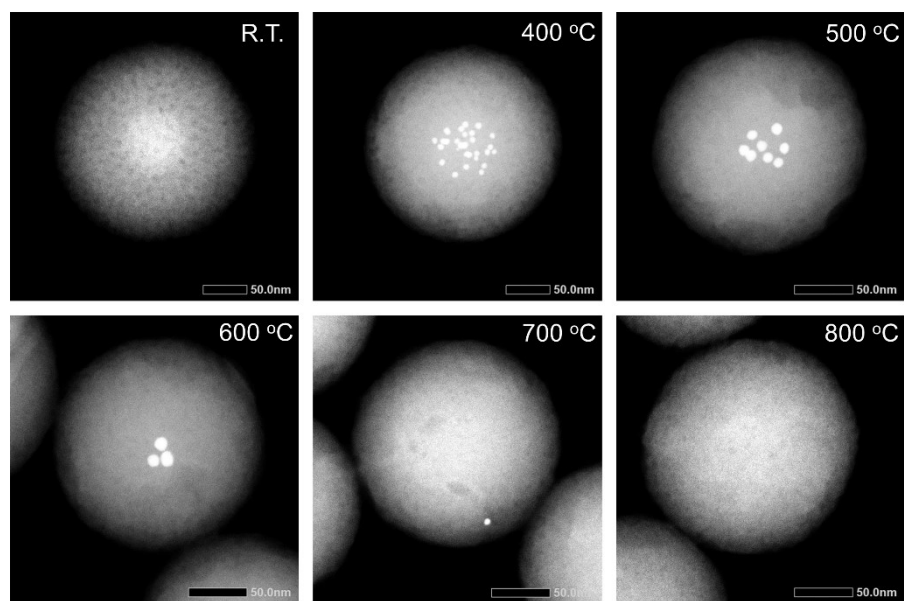

**Fig. S3** Ex situ HAADF-STEM images of Pd-NCs@NMPS after pyrolysis at different temperature.

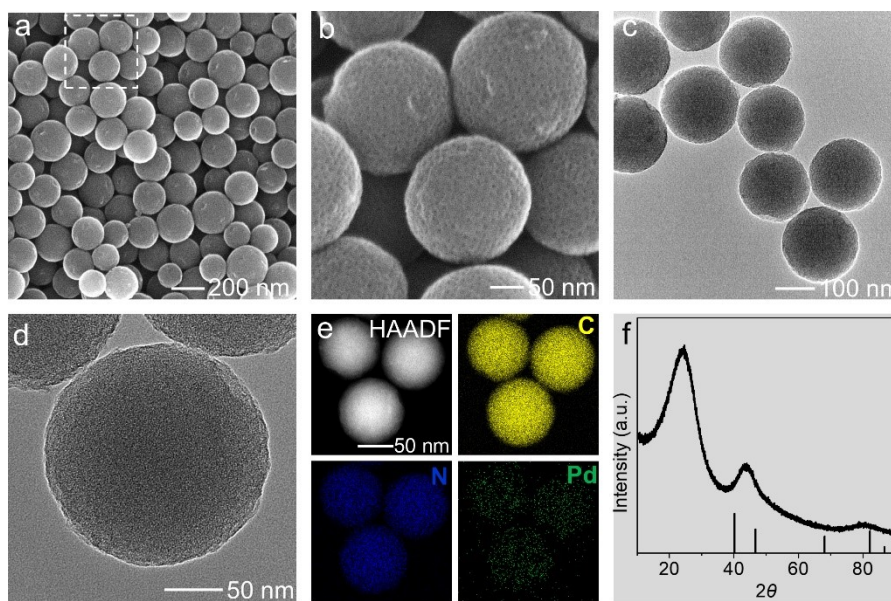

**Fig. S4** (a,b) SEM images, (c,d) TEM images, (e) HAADF-STEM and the corresponding EDS elemental mapping images, (f) XRD pattern of Pd<sub>1</sub>/NMCS-Ar.

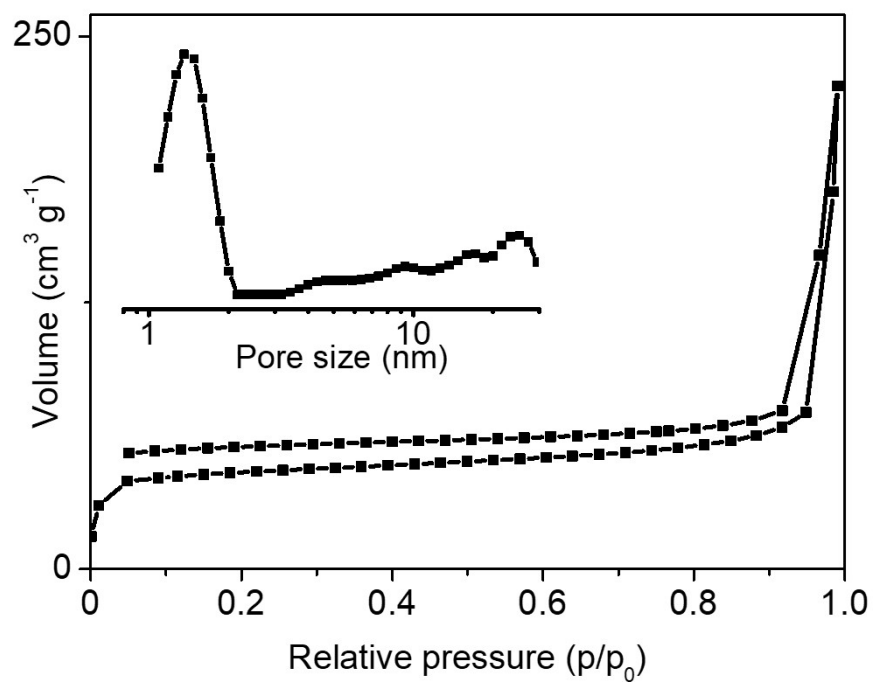

**Fig. S5** N<sub>2</sub>-sorption isotherm and the pore size distribution of Pd<sub>1</sub>/NMCS-Ar.

It is found that the adsorption and desorption branches are not closed for the sample of Pd<sub>1</sub>/NMCS-Ar. The phenomenon is often observed for the samples of porous polymers and nitrogen-doped carbons (*Angew. Chem. Int. Ed.* **2016**, *55*, 8850-8855).

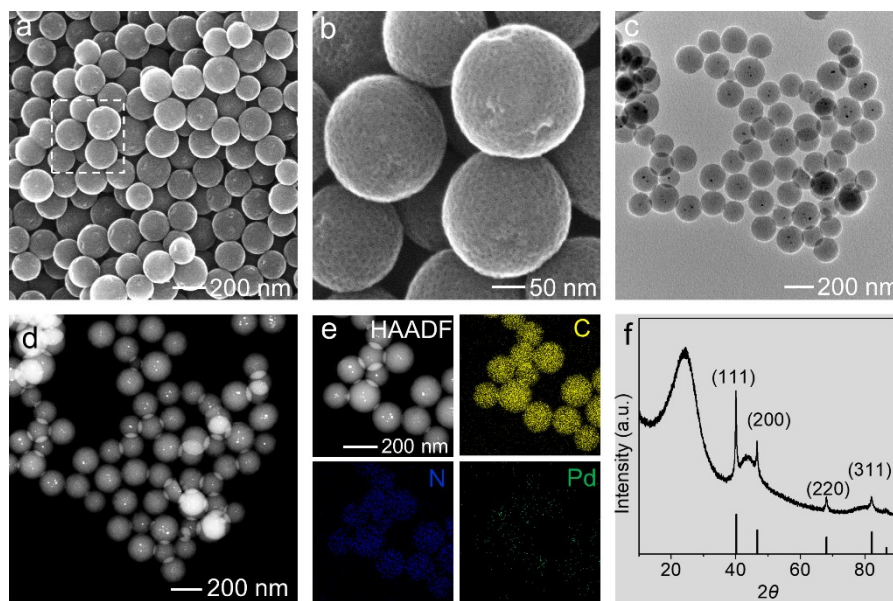

**Fig. S6** (a,b) SEM images, (c) TEM image, (d,e) HAADF-STEM and the corresponding EDS elemental mapping images, (f) XRD pattern of Pd@NMCS-H<sub>2</sub>.

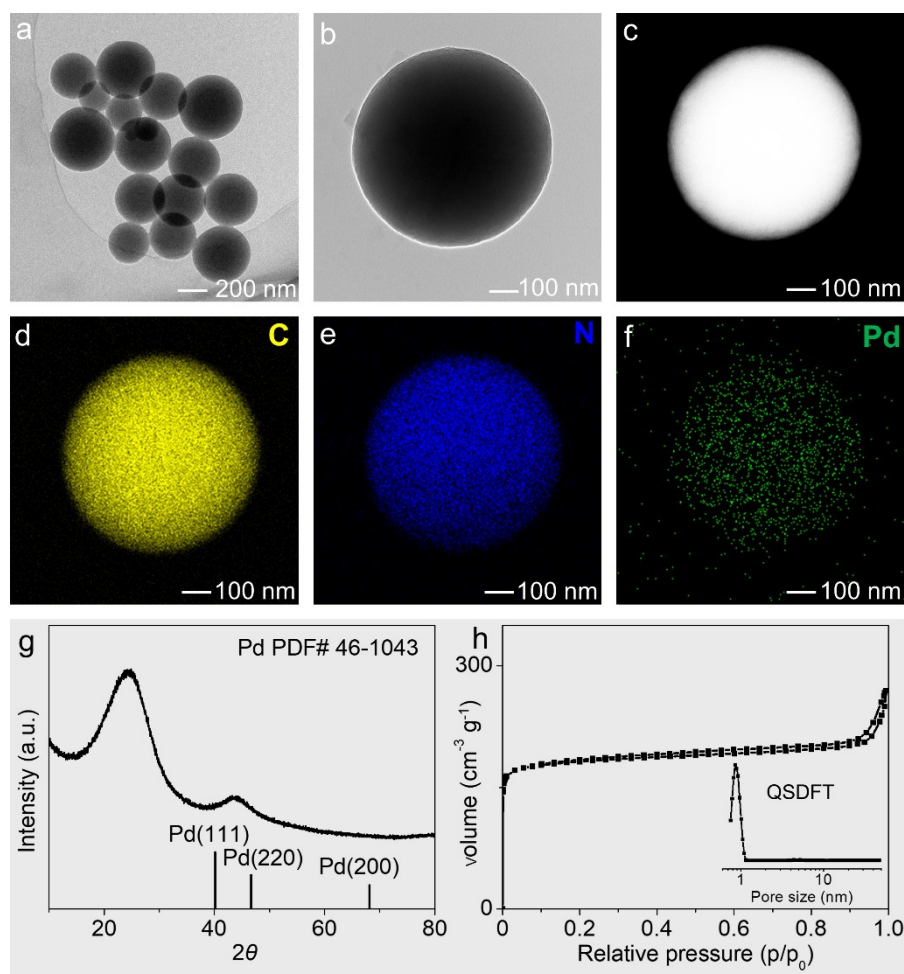

**Fig. S7** (a,b) TEM images, (c-f) HAADF-STEM and the corresponding EDS elemental mapping images, (g) XRD pattern and (h) N<sub>2</sub>-sorption isotherm and the pore size distribution (inset) of Pd<sub>1</sub>/NCS.



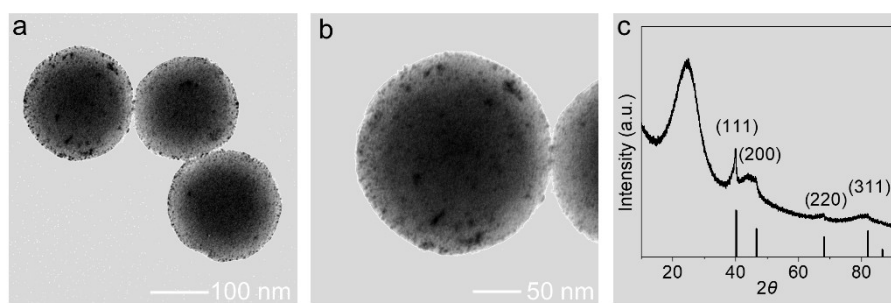

**Fig. S8** (a,b) TEM images and (c) XRD pattern of Pd-NPs/NMCS.

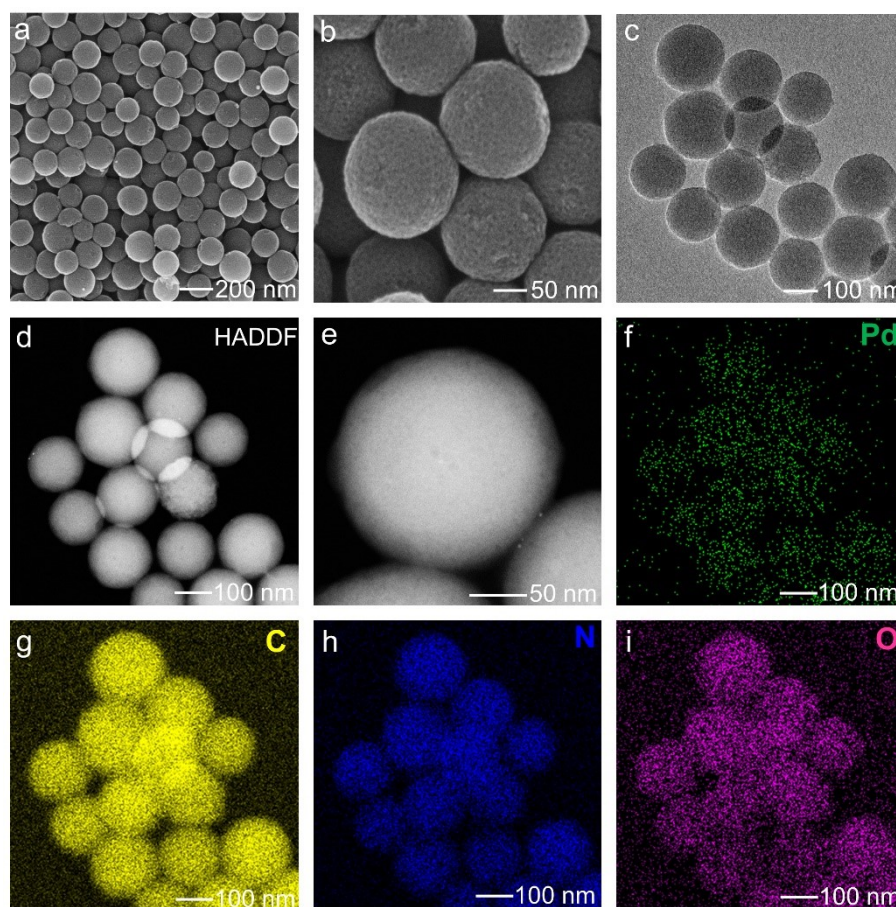

**Fig. S9** (a,b) SEM images, (c) TEM image, (d-i) HAADF-STEM and the corresponding EDS elemental mapping images of Pd<sub>1</sub>/NMCS after five runs.

**Table S1.** Textural parameters of the nitrogen-doped carbon catalysts.

| Sample                   | Nanospheres size (nm) | Textual properties                                 |                                                       | Chemical composition |                    |                    |                    |
|--------------------------|-----------------------|----------------------------------------------------|-------------------------------------------------------|----------------------|--------------------|--------------------|--------------------|
|                          |                       | S <sub>BET</sub> (m <sup>2</sup> g <sup>-1</sup> ) | V <sub>total</sub> (cm <sup>3</sup> g <sup>-1</sup> ) | N <sup>a</sup> wt%   | C <sup>b</sup> wt% | N <sup>b</sup> wt% | O <sup>b</sup> wt% |
| Pd <sub>1</sub> /NMCS    | ~177                  | 595                                                | 0.46                                                  | 9.3                  | 84.2               | 10.2               | 3.5                |
| Pd <sub>1</sub> /NMCS-Ar | ~193                  | 167                                                | 0.32                                                  | 6.5                  | 85.6               | 8.8                | 4.0                |
| Pd@NMCS-H <sub>2</sub>   | ~178                  | 482                                                | 0.57                                                  | 4.2                  | 86.0               | 6.1                | 6.8                |
| Pt <sub>1</sub> /NMCS    | ~144                  | 590                                                | 0.54                                                  | 9.1                  | --                 | --                 | --                 |
| Pd <sub>1</sub> /NCS     | 100~1000              | 728                                                | 0.42                                                  | 8.9                  | --                 | --                 | --                 |

<sup>a</sup> Measured by elemental analysis; <sup>b</sup> Measured by XPS.
